# Supplementary material for: Regulation of Eukaryotic RNAPs Activities by Phosphorylation
Source: PubMed Central journal article supplement (PMC8268151; doi:10.3389/fmolb.2021.681865), 2021-06-25
Supplement: Table1.pdf [file Table1.pdf]

| RNAP II |                       |                                                                                        | RNAP I   |           |                                                                                                               | RNAP III |          |                                                                   |
|---------|-----------------------|----------------------------------------------------------------------------------------|----------|-----------|---------------------------------------------------------------------------------------------------------------|----------|----------|-------------------------------------------------------------------|
| Rpb1    | <b>S</b>              | 7, 8, 449, 466, 473, 476, 513, 599, 751, 793, 1136, 1247, 1293, 1449, 1493, 1521, 1532 | Rpa190   | <b>S</b>  | 147, 174, 287, 291, 297, 354, 664, 685, 889, 1358, 1359, 1360, 1362, 1374, 1383, 1413, 1415, 1417, 1431, 1636 | Rpc160   | <b>T</b> | 9                                                                 |
|         | <b>T</b>              | 191, 1266, 1394, 1471                                                                  |          | <b>T</b>  | 150, 447, 1353, 1651                                                                                          |          |          |                                                                   |
|         | <b>Y</b>              | 1473                                                                                   |          | <b>Y</b>  | 149                                                                                                           |          |          |                                                                   |
| Rpb2    | <b>S</b>              | 2, 7, 156, 187, 218, 493, 645, 764, 869, 919, 982, 1045, 1145, 1221                    | Rpa135   | <b>S</b>  | 81, 86, 88, 115, 507, 712, 737, 1054, 1085, 1116, 1122, 1124, 1145, 1156                                      | Rpc128   | <b>T</b> | 40                                                                |
|         | <b>T</b>              | 500, 915, 916, 970, 971                                                                |          | <b>T</b>  | 746                                                                                                           |          |          |                                                                   |
|         | <b>Y</b>              | 890                                                                                    |          |           |                                                                                                               |          |          |                                                                   |
| Rpb3    | <b>S</b>              | 2                                                                                      | Rpc40    | <b>S</b>  | 2, 17, 24, 46, 220, 226, 243                                                                                  |          |          |                                                                   |
|         | <b>T</b>              | 250                                                                                    |          | <b>T</b>  | 15, 16                                                                                                        |          |          |                                                                   |
| Rpb11   |                       | -                                                                                      | Rpc19    | <b>S</b>  | 62, 141                                                                                                       |          |          |                                                                   |
|         |                       |                                                                                        |          | <b>T</b>  | 2, 15, 33                                                                                                     |          |          |                                                                   |
| Rpb9    | <b>S</b>              | 33, 40                                                                                 | Rpa12    | <b>S</b>  | 40, 58, 59, 70                                                                                                | Rpc11    | -        |                                                                   |
|         | <b>Y</b>              | 34                                                                                     |          |           |                                                                                                               |          |          |                                                                   |
| Rpb4    | <b>S</b>              | 53, 125, 197, 203, 215                                                                 | Rpa14    | <b>S</b>  | 113, 121                                                                                                      | Rpc17    | <b>S</b> | 84                                                                |
|         | <b>T</b>              | 134, 144, 193                                                                          |          | <b>T</b>  | 120, 133                                                                                                      |          |          |                                                                   |
| Rpb7    |                       | -                                                                                      | Rpa43    | <b>S</b>  | 2, 208, 220, 244, 251, 262, 263, 265, 269, 285, 306                                                           | Rpc25    | <b>S</b> | 162                                                               |
|         |                       |                                                                                        |          | <b>T</b>  | 25, 100                                                                                                       |          |          |                                                                   |
|         |                       |                                                                                        |          | <b>Y</b>  | 260                                                                                                           |          |          |                                                                   |
|         |                       |                                                                                        | Rpa34    | <b>S</b>  | 10, 12, 14, 60, 113, 115, 118, 140, 205                                                                       | Rpc37    | <b>S</b> | 2, 52, 206                                                        |
|         |                       |                                                                                        |          | <b>Y</b>  | 8                                                                                                             |          | <b>T</b> | 18, 61, 192                                                       |
|         |                       |                                                                                        | Rpa49    | <b>S</b>  | 8, 34, 70, 117, 151, 157, 169                                                                                 | Rpc53    | <b>S</b> | 12, 18, 27, 119, 122, 137, 138, 178, 181, 182, 224, 234, 246, 270 |
|         |                       |                                                                                        |          | <b>T</b>  | 36, 155                                                                                                       |          | <b>T</b> | 130, 228, 232, 347                                                |
|         |                       |                                                                                        |          |           |                                                                                                               | Rpc82    | <b>S</b> | 230, 306, 323, 344, 392, 394, 399, 421                            |
|         |                       |                                                                                        |          |           |                                                                                                               |          | <b>T</b> | 27, 430                                                           |
|         |                       |                                                                                        |          |           |                                                                                                               | Rpc34    | -        |                                                                   |
|         |                       |                                                                                        |          |           |                                                                                                               | Rpc31    | <b>S</b> | 13, 189                                                           |
|         |                       |                                                                                        |          |           |                                                                                                               |          | <b>T</b> | 101, 190                                                          |
|         | Common RNAPs subunits | Rpb5                                                                                   |          |           | <b>S</b>                                                                                                      | 158      |          |                                                                   |
| Rpb6    |                       |                                                                                        |          | <b>S</b>  | 2, 24, 102                                                                                                    |          |          |                                                                   |
|         |                       |                                                                                        |          | <b>T</b>  | 28, 41, 50, 82                                                                                                |          |          |                                                                   |
|         |                       |                                                                                        |          | <b>Y</b>  | 29, 88                                                                                                        |          |          |                                                                   |
| Rpb8    |                       |                                                                                        |          | <b>S</b>  | 73, 74, 78                                                                                                    |          |          |                                                                   |
|         |                       |                                                                                        |          | <b>T</b>  | 68                                                                                                            |          |          |                                                                   |
| Rpb10   |                       |                                                                                        |          | <b>S</b>  | 20                                                                                                            |          |          |                                                                   |
| Rpb12   |                       |                                                                                        | <b>S</b> | 2, 20, 41 |                                                                                                               |          |          |                                                                   |
|         |                       |                                                                                        | <b>T</b> | 19, 26    |                                                                                                               |          |          |                                                                   |

**Table S1. Phospho-sites in *Saccharomyces cerevisiae* RNAPs.** Rpb1-CTD phosphorylation sites are not included. Rpb5, 6, 8, 10 and 12 (in yellow boxes) are subunits shared by all three RNAPs. Rpc40 and 19 (in orange boxes) are common to RNAPI and III. S, serine; T, threonine; and Y, tyrosine. Numbers denote the corresponding amino acid of each subunit.
